# Supplementary material
Source: PubMed Central journal article supplement (PMC8119115)
Supplement: 07-0485.pdf [file 07-0485.pdf]

**On-line Table 1: Imaging, fetopathologic, and immunohistologic findings in group A fetuses**

| Case | US Findings                                                        | MR Findings                                                                                                             | (ADC, $\mu\text{m}^2/\text{ms}$ ) | WM ROI                 | MR/Fetopathologic Examinations Delay (days) | GA at TOP (weeks) | Neuropathologic Findings                                                       | Immunohistologic Results                  | Placental Findings                                       |
|------|--------------------------------------------------------------------|-------------------------------------------------------------------------------------------------------------------------|-----------------------------------|------------------------|---------------------------------------------|-------------------|--------------------------------------------------------------------------------|-------------------------------------------|----------------------------------------------------------|
| 1    | Mild bilateral ventriculomegaly                                    | Bilateral ventriculomegaly (15 mm on the right and 13 mm on the left), subependymal heterotopia, cavitation, WM: normal | 1.54                              | Right frontal          | 35                                          | 36                | Mild bilateral ventriculomegaly, subependymal heterotopia                      | A: +++ E: +<br>M: 0 N: 0<br>O: 0 V: +++   | No abnormality                                           |
| 2    | Intraventricular hemorrhage, frontal calcification                 | Polymicrogyria, calcified leukomalacia, WM: normal                                                                      | 1.40                              | Right frontal          | 3                                           | 30                | Polymicrogyria, calcified intraventricular hemorrhage                          | A: ++ E: +<br>M: ++ N: 0 O: 0             | No abnormality                                           |
| 3    | Suspicion of lissencephaly                                         | Lissencephaly, WM: normal                                                                                               | 1.65                              | Left frontal           | 17                                          | 32                | Microcephaly with simplified gyral pattern                                     | A: ++ E: 0<br>M: + N: 0<br>O: 0 V: +      | Placental hypotrophy, vascular lesions                   |
| 4    | Mild bilateral ventriculomegaly                                    | Bilateral ventriculomegaly (14.6 mm on the right and 15 mm on the left), WM: normal                                     | 1.75                              | Right frontal          | 18                                          | 34                | Mild bilateral ventriculomegaly, mild aqueductal stenosis                      | A: ++ E: +<br>M: 0 N: 0<br>O: 0 V: +++    | Partial circumvallate, small infarcts (10 % of volume)   |
| 5    | Suspicion of partial vermian agenesis                              | Partial vermian agenesis, WM: normal                                                                                    | 1.68                              | Left frontal           | 16                                          | 35                | Mild unilateral ventriculomegaly, partial vermian agenesis                     | A: +++ E: ++<br>M: 0 N: 0<br>O: 0 V: +++  | No abnormality                                           |
| 6    | Cervical cystic lymphangioma                                       | Lingual extension of the cystic lymphangioma, WM: normal                                                                | 1.80                              | Right frontal          | 17                                          | 34                | No cerebral abnormalities                                                      | A: ++ E: +<br>M: + N: 0<br>O: 0 V: ++     | No abnormality                                           |
| 7    | Severe unilateral ventriculomegaly                                 | Left unilateral ventriculomegaly (35.7 mm), WM: normal                                                                  | 1.62                              | Right frontal          | 6                                           | 37                | Severe unilateral ventriculomegaly                                             | A: + E: 0<br>M: + N: 0<br>O: 0 V: ++      | No abnormality                                           |
| 8    | Fetal hypokinesia                                                  | No structural abnormalities, WM: normal                                                                                 | 1.75                              | Right frontal          | 23                                          | 33                | Micrencephaly, arhinencephaly                                                  | A: +++ E: 0<br>M: + N: 0<br>O: 0 V: +     | No abnormality                                           |
| 9    | Corpus callosum agenesis, suspicion of posterior fossa abnormality | Corpus callosum agenesis, vermian hypoplasia, WM: normal                                                                | 1.70                              | Right temporal         | 4                                           | 34                | Corpus callosum agenesis, vermian hypoplasia, mild unilateral ventriculomegaly | A: + E: +<br>M: + N: 0<br>O: 0 V: +       | No abnormality                                           |
| 10   | Cardiac rhabdomyoma, suspicion of Bourneville tuberous sclerosis   | Subependymal tubers, WM: normal                                                                                         | 2.00                              | Right occipital        | 47                                          | 36                | WM, subependymal and cortical tubers                                           | A: + E: 0<br>M: +++ N: 0<br>O: 0 V: +     | Placental hypotrophy                                     |
| 11   | IUGR, Doppler abnormalities                                        | Subependymal pseudocysts, WM: *T1, **T2 (Figs 1A-C)                                                                     | 1.70                              | Left parieto-occipital | 4                                           | 31                | Delayed gyration, subependymal pseudocysts                                     | A: + E: +++<br>M: +++ N: 0<br>O: 0 V: +++ | Placental hypotrophy, voluminous subchorionic thrombosis |
| 12   | Toxoplasmosis seroconversion                                       | Focal parenchymal lesions, WM: normal                                                                                   | 1.64                              | Left frontal           | 6                                           | 29                | Necrotic focal parenchymal lesions                                             | A: + E: 0<br>M: + N: 0 O: 0<br>V: ++      | Granulomatous villitis                                   |

**Note:**—Immunohistochemical signal intensity was evaluated as mild (+), moderate (++) and high (+++). 0 indicates absence of abnormality; A, astrogliosis; E, edema; IUGR, intrauterine growth restriction; M, microgliosis; N, neuronal abnormalities; O, oligodendrocytic abnormalities; US, ultrasonography; WM, white matter; ROI, region of interest; ADC, apparent diffusion coefficient; GA, gestational age; TOP, termination of pregnancy; V, vessel proliferation or congestion; \*T1, T1 hypointensity; \*\*T2, T2 hyperintensity.

**On-line Table 2: Imaging, fetopathologic, and immunohistologic findings in group B fetuses**

| Case | US Findings                                                                                              | MR Findings                                                                                            | (ADC, $\mu\text{m}^2/\text{ms}$ ) | WM ROI                  | MR/Feto-pathologic Examinations Delay (days) | GA at TOP (weeks) | Neuropathologic Findings                                                                                     | Immunohistologic Results                     | Placental Findings                            |
|------|----------------------------------------------------------------------------------------------------------|--------------------------------------------------------------------------------------------------------|-----------------------------------|-------------------------|----------------------------------------------|-------------------|--------------------------------------------------------------------------------------------------------------|----------------------------------------------|-----------------------------------------------|
| 1    | Severe bilateral ventriculomegaly                                                                        | Intraventricular and parenchymal hemorrhage, WM: *T1, **T2                                             | 2.20                              | Left frontal            | 2                                            | 35                | Severe bilateral ventriculomegaly, intraventricular and parenchymal hemorrhage                               | A: +++<br>E: +++<br>M: + N: 0<br>O: 0 V: +++ | Placental hypotrophy, mild ischemia           |
| 2    | IUGR, Doppler abnormalities                                                                              | No structural abnormalities, WM: *T1, **T2                                                             | 2.25                              | Left parieto-occipital  | 5                                            | 33                | WM edema                                                                                                     | A: ++ E: ++<br>M: +++ N: 0<br>O: 0 V: +      | Velamentous cord insertion                    |
| 3    | Mild left ventriculomegaly, CMV infection, PCR +                                                         | Left ventriculomegaly (12.8 mm), ventricular septation, WM: *T1, **T2                                  | 2.28                              | Left frontal            | 20                                           | 38                | Mild bilateral ventriculomegaly, subependymal pseudocysts, viral inclusions                                  | A: +++ E: +<br>M: +++ N: 0<br>O: 0 V: ++     | Chronic villitis, no viral inclusions         |
| 4    | CMV infection, PCR +                                                                                     | No structural abnormalities, WM: *T1, **T2                                                             | 2.25                              | Left frontal            | 6                                            | 32                | Subependymal pseudocysts, viral inclusions                                                                   | A: +++ E: +<br>M: +++ N: 0<br>O: 0 V: +      | Specific chronic villitis, viral inclusions   |
| 5    | Familial history of Joubert syndrome, severe unilateral ventriculomegaly                                 | Left ventriculomegaly (14 mm), WM: normal T1, **T2 (Figs 1D-F)                                         | 2.10                              | Left parieto-occipital  | 14                                           | 33                | Mild unilateral ventriculomegaly                                                                             | A: +++ E: +<br>M: + N: 0<br>O: 0 V: +        | Circummarginate placenta                      |
| 6    | Maternal CMV seroconversion, mild unilateral ventriculomegaly, bilateral subependymal pseudocysts, PCR - | Bilateral ventriculomegaly (both 13 mm), bilateral subependymal pseudocysts, WM: *T1, **T2 (Figs 1G-I) | 2.20                              | Right frontal           | 8                                            | 35                | Mild bilateral ventriculomegaly, bilateral subependymal pseudocysts, no viral inclusions, no fetal infection | A: +++ E: +<br>M: + N: 0<br>O: 0 V: ++       | No abnormality                                |
| 7    | Mild bilateral ventriculomegaly, subependymal pseudocysts                                                | Subependymal pseudocysts, WM: *T1, **T2                                                                | 2.25                              | Right occipital         | 20                                           | 37                | Bilateral subependymal pseudocysts, macrencephaly, wide cavum                                                | A: +++ E: +<br>M: + N: 0<br>O: 0 V: +        | No abnormality                                |
| 8    | IUGR, Doppler abnormalities                                                                              | Delayed gyration, WM: *T1, **T2                                                                        | 2.40                              | Right frontal           | 11                                           | 33                | Delayed gyration                                                                                             | A: +++<br>E: +++<br>M: + N: 0<br>O: 0 V: +   | Placental hypotrophy, villous ischemic change |
| 9    | Mild bilateral ventriculomegaly, CMV infection PCR +                                                     | Bilateral ventriculomegaly (14.1 mm on the right and 13.4 mm on the left), WM: *T1, **T2               | 2.39                              | Right parieto-occipital | 10                                           | 38                | Mild bilateral ventriculomegaly, viral inclusions                                                            | A: +++<br>E: +++<br>M: +++<br>N: 0           | Specific chronic villitis, viral inclusions   |

**Note:**—Immunohistochemical signal intensity was evaluated as mild (+), moderate (++) and high (+++). 0 indicates absence of abnormality; A, astrogliosis; E, edema; CMV, cytomegalovirus; IUGR, intrauterine growth restriction; M, microgliosis; N, neuronal abnormalities; O, oligodendrocytic abnormalities; PCR, polymerase chain reaction in amniotic fluid; US, ultrasonography; WM, white matter; ROI, region of interest; ADC, apparent diffusion coefficient; GA, gestational age; TOP, termination of pregnancy; V, vessel proliferation or congestion; \*T1, T1 hypointensity, \*\*T2, T2 hyperintensity.
